# Supplementary material for: Evaluation of Patient-Friendly Diagnosis Clarifications in a Hospital Patient Portal
Source: PubMed Central journal article supplement — Appl Clin Inform. 2023 Jun 21;14(3):455–64. doi: 10.1055/a-2067-5310 (PMC10284629; doi:10.1055/a-2067-5310), 2023-06-21
Supplement: 10-1055-a-2067-5310-s202210ra0283.pdf [file 10-1055-a-2067-5310-s202210ra0283.pdf]

## Supplemental Appendix 1 Terminologies

We further improved the clarifications based on the input from the validation study and updated the clarifications with the latest version of the PFRS. To minimize the errors and clarifications considered to be unacceptable that we had identified in our validation study, we made 219 modifications in the patient-friendly extension, thus resulting in a local extension that included the modifications. We excluded 13 concepts and 22 descriptions from the extension, and excluded 20 diagnoses from the Diagnosethesaurus (DT), accepted 2 descriptions, preferred 23 descriptions, added 20 synonyms and 73 text definitions, and replaced 8 synonyms and 38 text definitions. Additionally, we decided to

provide the same general clarification for all metastases (based on the September 2021 edition), to prevent problems with metastases clarifications. The coverage of clarifications by supertypes had dropped from 86.79 to 83.13% because of the modifications (e.g., excluding the clarification “a type of disease”) and dropped further to 65.99%, because of newly introduced concepts in DT. We used these modified supertype clarifications from the April 2020 DT version and the descriptions from the February 2022 DT version. The coverage of the diagnoses by clarifications was 9.4 times higher with generalization compared with the coverage of diagnoses by clarifications based on descriptions from the PFRS only. See [Table S1](#).

### Supplementary Appendix Table S1 Diagnosethesaurus coverage

| Statistic                                                 | <i>n</i> | % of DT | % of SCT |
|-----------------------------------------------------------|----------|---------|----------|
| Diagnoses                                                 | 25,199   | 100.0   |          |
| Diagnoses with SNOMED CT id                               | 22,762   | 90.3    | 100.0    |
| Diagnoses with clarifications by synonyms and definitions | 1,576    | 6.3     | 6.9      |
| Diagnoses with clarifications by generalization           | 13,304   | 52.8    | 58.5     |
| Total diagnoses with clarifications                       | 14,880   | 59.1    | 65.4     |

Abbreviations: CT, computed tomography; DT, Diagnosethesaurus; SCT, SNOMED CT.

## Supplementary Appendix 4

Differences in conversion per user characteristic and diagnosis.

**Supplementary Table S2** *p*-Values of the Fisher exact test and adjusted *p*-values after Benjamini–Yekutieli correction for the false discovery rate, testing whether the differences in proportions of users that viewed their problem list and that clicked on an info button are different

| Level     | Variable              | Viewed differences |                   | Clicked differences |                   |
|-----------|-----------------------|--------------------|-------------------|---------------------|-------------------|
|           |                       | <i>p</i> -Value    | Adjusted <i>p</i> | <i>p</i> -Value     | Adjusted <i>p</i> |
| Patient   | Age group             | 0.0062             | 0.0560            | 0.4739              | 1                 |
|           | Age subgroup          | 0.5652             | 1                 | 0.8596              | 1                 |
|           | Gender                | 0.0002             | 0.0037            | 0.7965              | 1                 |
|           | User type             | 0.6249             | 1                 | 0.2561              | 1                 |
|           | Latest diagnosis year | 0.0002             | 0.0037            | <0.0001             | 0.0003            |
|           | Number of diagnoses   | 0.0097             | 0.0746            | 0.0468              | 0.2811            |
| Diagnosis | Diagnosis concept     | 0.5231             | 1                 | 0.0051              | 0.0547            |
|           | Medical specialty     | 0.0431             | 0.2811            | 0.0003              | 0.0037            |

## Conversion per User Characteristic

**Supplementary Table S3** Logins and problem list views per user characteristic with number of users that logged in “l,” the percentage of total number of patients for whom users logged in (19,961), the number of users that viewed their problem list “v,” with the percentage of users that logged in that viewed their problem list, the odds ratio of viewing the problem list after logging in, with 95% confidence intervals, *p*-value of the Fisher exact test, and \* indicating whether the odds the direction of the odds (+ or -) or whether the category was the reference category (indicated with “ref”)

| Characteristic        | Category     | Logged in |       | Viewed problem list |      |              |              |                 |   |     |
|-----------------------|--------------|-----------|-------|---------------------|------|--------------|--------------|-----------------|---|-----|
|                       |              | l         | % l   | v                   | % v  | OR           | (95% CI)     | <i>p</i> -Value | * | ref |
| Age                   | 00–09        | 373       | 1.9   | 130                 | 34.9 | 1.25         | (0.99, 1.57) | 0.0587          |   |     |
|                       | 10–19        | 492       | 2.5   | 166                 | 33.7 | 1.19         | (0.96, 1.45) | 0.0951          |   |     |
|                       | 20–29        | 2,280     | 11.4  | 764                 | 33.5 | 1.17         | (1.05, 1.32) | 0.0057          | + |     |
|                       | 30–39        | 3,612     | 18.1  | 1,085               | 30.1 | –            | –            | –               | – | ref |
|                       | 40–49        | 2,807     | 14.1  | 929                 | 33.1 | 1.15         | (1.03, 1.28) | 0.0092          | + |     |
|                       | 50–59        | 3,284     | 16.5  | 1,110               | 33.8 | 1.19         | (1.07, 1.32) | 0.0008          | + |     |
|                       | 60–69        | 3,478     | 17.4  | 1,193               | 34.3 | 1.22         | (1.10, 1.35) | 0.0001          | + |     |
|                       | 70–79        | 2,861     | 14.3  | 923                 | 32.3 | 1.11         | (1.00, 1.23) | 0.0583          |   |     |
|                       | 80–89        | 711       | 3.6   | 211                 | 29.7 | 0.98         | (0.82, 1.18) | 0.8580          |   |     |
| ≥90                   | 63           | 0.3       | 19    | 30.2                | 1.01 | (0.55, 1.77) | 1            |                 |   |     |
| Age subgroups         | 00           | 17        | 0.1   | 7                   | 41.2 | 1.32         | (0.42, 3.97) | 0.6072          |   |     |
|                       | 01–09        | 356       | 1.8   | 123                 | 34.6 | –            | –            | –               | – | ref |
|                       | 10–11        | 54        | 0.3   | 14                  | 25.9 | 0.66         | (0.32, 1.30) | 0.2782          |   |     |
|                       | 12–15        | 131       | 0.7   | 51                  | 38.9 | 1.21         | (0.78, 1.86) | 0.3944          |   |     |
|                       | 16–17        | 94        | 0.5   | 33                  | 35.1 | 1.02         | (0.61, 1.69) | 0.9038          |   |     |
|                       | 18–19        | 213       | 1.1   | 68                  | 31.9 | 0.89         | (0.61, 1.29) | 0.5822          |   |     |
| Gender                | Male         | 7,629     | 38.2  | 2,375               | 31.1 | 0.89         | (0.84, 0.95) | 0.0002          | – |     |
|                       | Female       | 12,332    | 61.8  | 4,155               | 33.7 | –            | –            | –               | – | ref |
| Account               | Proxy        | 42        | 0.2   | 12                  | 28.6 | 0.82         | (0.38, 1.66) | 0.6249          |   |     |
|                       | Patient      | 19,923    | 99.8  | 6,519               | 32.7 | –            | –            | –               | – | ref |
| Diagnoses             | ≥2           | 3,288     | 16.5  | 1,124               | 34.2 | 1.11         | (1.02, 1.20) | 0.0139          | + |     |
|                       | 1            | 4,638     | 23.2  | 1,567               | 33.8 | 1.09         | (1.01, 1.17) | 0.0210          | + |     |
|                       | 0            | 12,032    | 60.3  | 3,839               | 31.9 | –            | –            | –               | – | ref |
| Latest diagnosis year | 2022         | 1,275     | 6.4   | 495                 | 38.8 | 1.35         | (1.20, 1.53) | < 0.0001        | + |     |
|                       | 2021         | 1,457     | 7.3   | 490                 | 33.6 | 1.08         | (0.96, 1.22) | 0.1814          |   |     |
|                       | 2020         | 1,599     | 8.0   | 517                 | 32.3 | 1.02         | (0.91, 1.14) | 0.7107          |   |     |
|                       | 2019         | 1,421     | 7.1   | 477                 | 33.6 | 1.08         | (0.96, 1.22) | 0.1961          |   |     |
|                       | 2018         | 984       | 4.9   | 328                 | 33.3 | 1.07         | (0.93, 1.23) | 0.3745          |   |     |
|                       | ≤2017        | 1,193     | 6.0   | 384                 | 32.2 | 1.01         | (0.89, 1.15) | 0.8452          |   |     |
|                       | No diagnosis | 12,032    | 60.3  | 3,839               | 31.9 | –            | –            | –               | – | ref |
| Total                 |              | 19,961    | 100.0 | 6,530               | 32.7 |              |              |                 |   |     |

**Supplementary Table S4** Number of users with certain user characteristics that viewed info buttons and clicked on info buttons, with percentages and 95% confidence intervals (Cis)

| Characteristic        | Value   | Viewed info button |       | Clicked on info button |       |              |               |          |   |     |
|-----------------------|---------|--------------------|-------|------------------------|-------|--------------|---------------|----------|---|-----|
|                       |         | v                  | % v   | c                      | % c   | OR           | (95% CI)      | p-Value  | * | ref |
| Age                   | 00–09   | 54                 | 41.54 | 32                     | 59.26 | 1.23         | (0.67, 2.29)  | 0.5649   |   |     |
|                       | 10–19   | 58                 | 34.94 | 33                     | 56.90 | 1.11         | (0.62, 2.02)  | 0.7807   |   |     |
|                       | 20–29   | 181                | 23.69 | 95                     | 52.49 | 0.93         | (0.65, 1.33)  | 0.7272   |   |     |
|                       | 30–39   | 265                | 24.42 | 138                    | 52.08 | 0.92         | (0.67, 1.25)  | 0.5927   |   |     |
|                       | 40–49   | 333                | 35.84 | 191                    | 57.36 | 1.14         | (0.85, 1.52)  | 0.3910   |   |     |
|                       | 50–59   | 442                | 39.82 | 259                    | 58.60 | 1.20         | (0.91, 1.56)  | 0.1858   |   |     |
|                       | 60–69   | 487                | 40.82 | 264                    | 54.21 | –            | –             | –        |   | ref |
|                       | 70–79   | 417                | 45.18 | 218                    | 52.28 | 0.93         | (0.71, 1.21)  | 0.5928   |   |     |
|                       | 80–89   | 114                | 54.03 | 56                     | 49.12 | 0.82         | (0.53, 1.25)  | 0.3489   |   |     |
| ≥90                   | 12      | 63.16              | 5     | 41.67                  | 0.60  | (0.15, 2.25) | 0.5597        |          |   |     |
| Age subgroups         | 00      | 2                  | 28.57 | 1                      | 50.00 | 0.68         | (0.01, 55.66) | 1        |   |     |
|                       | 01–09   | 52                 | 42.28 | 31                     | 59.62 | –            | –             | –        |   | ref |
|                       | 10–11   | 3                  | 21.43 | 1                      | 33.33 | 0.35         | (0.01, 7.03)  | 0.5652   |   |     |
|                       | 12–15   | 24                 | 47.06 | 15                     | 62.50 | 1.13         | (0.38, 3.50)  | 1        |   |     |
|                       | 16–17   | 13                 | 39.39 | 6                      | 46.15 | 0.59         | (0.14, 2.36)  | 0.5327   |   |     |
|                       | 18–19   | 18                 | 26.47 | 11                     | 61.11 | 1.06         | (0.31, 3.80)  | 1        |   |     |
| Gender                | Male    | 856                | 36.04 | 471                    | 55.02 | 1.02         | (0.86, 1.22)  | 0.7965   |   |     |
|                       | Female  | 1,507              | 36.27 | 820                    | 54.41 | –            | –             | –        |   | ref |
| Account               | Proxy   | 7                  | 58.33 | 2                      | 28.57 | 0.33         | (0.03, 2.03)  | 0.2561   |   |     |
|                       | Patient | 2,357              | 36.16 | 1,289                  | 54.69 | –            | –             | –        |   | ref |
| Diagnoses             | ≥2      | 1,094              | 97.33 | 622                    | 56.86 | 1.18         | (1.00, 1.40)  | 0.0467   | + |     |
|                       | 1       | 1,269              | 80.98 | 669                    | 52.72 | –            | –             | –        |   | ref |
| Latest diagnosis year | 2022    | 426                | 86.06 | 323                    | 75.82 | 3.08         | (2.30, 4.15)  | < 0.0001 | + |     |
|                       | 2021    | 449                | 91.63 | 258                    | 57.46 | 1.33         | (1.02, 1.74)  | 0.0348   | + |     |
|                       | 2020    | 476                | 92.07 | 240                    | 50.42 | –            | –             | –        |   | ref |
|                       | 2019    | 420                | 88.05 | 205                    | 48.81 | 0.94         | (0.71, 1.23)  | 0.6399   |   |     |
|                       | 2018    | 276                | 84.15 | 120                    | 43.48 | 0.76         | (0.55, 1.03)  | 0.0695   |   |     |
|                       | ≤2017   | 316                | 82.29 | 145                    | 45.89 | 0.83         | (0.62, 1.12)  | 0.2179   |   |     |
| Total                 |         | 2,363              | 36.19 | 1,291                  | 54.63 |              |               |          |   |     |

Abbreviation: OR, odds ratio.

Note: The percentages and CIs concern the number of users that viewed info buttons compared with the number that viewed the problem list, the number of users that clicked on an info button compared with the number of users that viewed an info button, and the number of users that provided a rating (answer) compared with the number of users that clicked on an info button. The columns with the asterisks \* show whether the CI is significantly differs from (whether it is lower or higher than) the CI of the total number of info button views, clicks, or answers.

## Conversion per Medical Specialty

**Supplementary Table S5** Logins and problem list views of patients with one or more diagnoses per medical specialty with number of users that logged in or viewed their problem list with percentages and 95% confidence intervals (CIs)

| Specialty                           | Logged in |       | Viewed problem list |      |      |          |         |         |   |     |
|-------------------------------------|-----------|-------|---------------------|------|------|----------|---------|---------|---|-----|
|                                     | l         | % l   | v                   | % v  | OR   | (95% CI) |         | p-Value | * | ref |
| Orthopedics                         | 2,033     | 100.0 | 701                 | 34.5 |      |          |         |         |   | ref |
| Ear, nose, and throat surgery       | 1,636     | 16.8  | 570                 | 34.8 | 1.02 | (0.88,   | 1.17)   | 0.8342  |   |     |
| Ophthalmology                       | 1,359     | 13.5  | 433                 | 31.9 | 0.89 | (0.77,   | 1.03)   | 0.1188  |   |     |
| Surgery                             | 1,086     | 11.2  | 358                 | 33.0 | 0.93 | (0.80,   | 1.10)   | 0.4048  |   |     |
| Dermatology                         | 1,037     | 9.0   | 370                 | 35.7 | 1.05 | (0.90,   | 1.24)   | 0.5219  |   |     |
| Neurology                           | 777       | 8.6   | 260                 | 33.5 | 0.96 | (0.80,   | 1.14)   | 0.6250  |   |     |
| Internal medicine                   | 541       | 6.4   | 161                 | 29.8 | 0.81 | (0.65,   | 0.99)   | 0.0404  | - |     |
| Rheumatology                        | 511       | 4.5   | 172                 | 33.7 | 0.96 | (0.78,   | 1.19)   | 0.7546  |   |     |
| Cardiology                          | 501       | 4.2   | 161                 | 32.1 | 0.90 | (0.73,   | 1.11)   | 0.3434  |   |     |
| Urology                             | 486       | 4.1   | 147                 | 30.2 | 0.82 | (0.66,   | 1.03)   | 0.0781  |   |     |
| Plastic surgery                     | 363       | 4.0   | 107                 | 29.5 | 0.79 | (0.62,   | 1.02)   | 0.0705  |   |     |
| Pulmonary medicine                  | 356       | 3.0   | 133                 | 37.4 | 1.13 | (0.89,   | 1.44)   | 0.3057  |   |     |
| Gastrointestinal and liver diseases | 271       | 2.9   | 99                  | 36.5 | 1.09 | (0.83,   | 1.43)   | 0.4980  |   |     |
| Pediatrics                          | 265       | 2.2   | 94                  | 35.5 | 1.04 | (0.79,   | 1.37)   | 0.7837  |   |     |
| Gynecology                          | 169       | 2.2   | 59                  | 34.9 | 1.02 | (0.72,   | 1.43)   | 0.9330  |   |     |
| Revalidation                        | 160       | 1.4   | 66                  | 41.2 | 1.33 | (0.95,   | 1.87)   | 0.0857  |   |     |
| Psychiatry                          | 153       | 1.3   | 53                  | 34.6 | 1.01 | (0.70,   | 1.44)   | 1       |   |     |
| Pain medicine                       | 146       | 1.3   | 61                  | 41.8 | 1.36 | (0.95,   | 1.94)   | 0.0875  |   |     |
| Anesthesiology                      | 132       | 1.2   | 37                  | 28.0 | 0.74 | (0.49,   | 1.11)   | 0.1549  |   |     |
| Geriatrics                          | 109       | 1.1   | 31                  | 28.4 | 0.76 | (0.48,   | 1.17)   | 0.2143  |   |     |
| Intensive care                      | 5         | 0.9   | 3                   | 60.0 | 2.85 | (0.33,   | 34.18)  | 0.3477  |   |     |
| Neurosurgery                        | 2         | 0.0   | 1                   | 50.0 | 1.90 | (0.02,   | 149.09) | 1       |   |     |
| Nephrology                          | 1         | 0.0   | 0                   | 0.0  |      |          |         | -       |   |     |
| Obstetrics                          | 1         | 0.0   | 0                   | 0.0  |      |          |         | -       |   |     |

Abbreviation: OR, odds ratio.

Note: The percentage of logins concerns the percentage of the sum of the total number patients with one or more diagnoses per specialty (12,100), while the percentage of views concerns the percentage of users that viewed their problem list of the total number of users with that characteristic that logged in. The column with an asterisk \* shows whether the CI is significantly lower or higher than the CI of the total number of views.

**Supplementary Table S6** Number, percentage, and confidence interval (CI) of patient account users that viewed info buttons, clicked on info buttons, and answered the questionnaire per medical specialty of the diagnoses registered

| Specialty                           | Viewed info button |       | Clicked on info button |       |      |          |         |          |   |     |
|-------------------------------------|--------------------|-------|------------------------|-------|------|----------|---------|----------|---|-----|
|                                     | v                  | % v   | c                      | % c   | OR   | (95% CI) |         | p-Value  | * | ref |
| Orthopedics                         | 637                | 90.9  | 343                    | 53.8  | –    | –        | –       | –        |   | ref |
| Ear, nose, and throat surgery       | 527                | 92.5  | 251                    | 47.6  | 0.78 | (0.61,   | 0.99)   | 0.0392   | – |     |
| Dermatology                         | 318                | 85.9  | 125                    | 39.3  | 0.56 | (0.42,   | 0.74)   | < 0.0001 | – |     |
| Surgery                             | 305                | 85.2  | 142                    | 46.6  | 0.75 | (0.56,   | 0.99)   | 0.0369   | – |     |
| Ophthalmology                       | 300                | 69.3  | 128                    | 42.7  | 0.64 | (0.48,   | 0.85)   | 0.0016   | – |     |
| Neurology                           | 220                | 84.6  | 101                    | 45.9  | 0.73 | (0.53,   | 1.00)   | 0.0503   |   |     |
| Rheumatology                        | 156                | 90.7  | 73                     | 46.8  | 0.75 | (0.52,   | 1.09)   | 0.1284   |   |     |
| Internal Medicine                   | 139                | 86.3  | 70                     | 50.4  | 0.87 | (0.59,   | 1.28)   | 0.5115   |   |     |
| Urology                             | 127                | 86.4  | 48                     | 37.8  | 0.52 | (0.34,   | 0.78)   | 0.0013   | – |     |
| Cardiology                          | 117                | 72.7  | 66                     | 56.4  | 1.11 | (0.73,   | 1.69)   | 0.6156   |   |     |
| Pulmonary medicine                  | 115                | 86.5  | 53                     | 46.1  | 0.73 | (0.48,   | 1.11)   | 0.1293   |   |     |
| Gastrointestinal and liver diseases | 97                 | 98.0  | 47                     | 48.5  | 0.81 | (0.51,   | 1.26)   | 0.3280   |   |     |
| Pediatrics                          | 73                 | 77.7  | 32                     | 43.8  | 0.67 | (0.40,   | 1.12)   | 0.1092   |   |     |
| Revalidation                        | 60                 | 90.9  | 36                     | 60.0  | 1.29 | (0.73,   | 2.31)   | 0.4166   |   |     |
| Plastic surgery                     | 56                 | 52.3  | 21                     | 37.5  | 0.51 | (0.28,   | 0.93)   | 0.0249   | – |     |
| Gynecology                          | 48                 | 81.4  | 18                     | 37.5  | 0.51 | (0.26,   | 0.98)   | 0.0353   | – |     |
| Pain medicine                       | 43                 | 70.5  | 25                     | 58.1  | 1.19 | (0.61,   | 2.37)   | 0.6373   |   |     |
| Anesthesiology                      | 31                 | 83.8  | 11                     | 35.5  | 0.47 | (0.20,   | 1.05)   | 0.0639   |   |     |
| Geriatrics                          | 18                 | 58.1  | 13                     | 72.2  | 2.23 | (0.73,   | 8.07)   | 0.1523   |   |     |
| Psychiatry                          | 6                  | 11.3  | 3                      | 50.0  | 0.86 | (0.11,   | 6.45)   | 1        |   |     |
| Intensive care                      | 3                  | 100.0 | 2                      | 66.7  | 1.71 | (0.09,   | 101.42) | 1        |   |     |
| Neurosurgery                        | 1                  | 100.0 | 1                      | 100.0 |      |          |         |          |   |     |
| Nephrology                          | 0                  | 0.0   | 0                      | 0     |      |          |         |          |   |     |
| Obstetrics                          | 0                  | 0.0   | 0                      | 0     |      |          |         |          |   |     |

Abbreviation: OR, odds ratio.

Note: The percentages and CIs concern the number of users that viewed info buttons compared with the number that viewed the problem list, the number of users that clicked on an info button compared with the number of users that viewed an info button, and the number of users that provided a rating (answer) compared with the number of users that clicked on an info button. The columns with the asterisks \* show whether the CI is significantly differs from (whether it is lower or higher than) the CI of the total number of info button views, clicks, or answers.

### Conversion per Diagnosis

**Supplementary Table S7** Top 20 of patient account users with a certain diagnosis that logged in, with the SNOMED CT concept Id, diagnosis description (SNOMED CT preferred term) and clarification, the number of diagnoses for which patients logged in, percentage of the sum of the number of patients that logged per diagnosis (13,939), and 95% confidence intervals

| Id             | Diagnosis                                           | Clarification                                                                                                                                                                                                              | Logged in |     | Viewed problem list |      |      |              |         |   |     |     |
|----------------|-----------------------------------------------------|----------------------------------------------------------------------------------------------------------------------------------------------------------------------------------------------------------------------------|-----------|-----|---------------------|------|------|--------------|---------|---|-----|-----|
|                |                                                     |                                                                                                                                                                                                                            | I         | %   | v                   | %    | OR   | (95% CI)     | p-Value | * | ref |     |
| 239873007      | Osteoarthritis of knee                              | Osteoarthritis: this is a chronic joint disease in which alteration of the cartilage in the joints leads to pain and stiffness.                                                                                            | 214       | 1.5 | 61                  | 28.5 | -    | -            | -       | - | -   | ref |
| 442520000      | Inflammation of rotator cuff tendon                 | A condition of tendon and shoulder.                                                                                                                                                                                        | 185       | 1.3 | 71                  | 38.4 | 1.56 | (1.00, 2.43) | 0.0427  | + |     |     |
| 267103008      | Feeling of lump in throat (globus feeling in Dutch) | Another word for "globus feeling" is lump in the throat: feeling that there is a slimy plug in the throat that cannot be swallowed.                                                                                        | 139       | 1.0 | 58                  | 41.7 | 1.79 | (1.12, 2.88) | 0.0114  | + |     |     |
| 21522001       | Abdominal pain                                      | Nagging, cramping, or stabbing pain in the abdominal area.                                                                                                                                                                 | 133       | 0.9 | 58                  | 43.6 | 1.94 | (1.20, 3.13) | 0.0052  | + |     |     |
| 239872002      | Osteoarthritis of hip                               | Osteoarthritis: this is a chronic joint disease in which alteration of the cartilage in the joints leads to pain and stiffness.                                                                                            | 133       | 0.9 | 45                  | 33.8 | 1.28 | (0.78, 2.10) | 0.3378  |   |     |     |
| 57406009       | Carpal tunnel syndrome                              | Disease in the wrist that results from putting too much pressure on a major nerve that runs through the wrist canal.                                                                                                       | 121       | 0.9 | 42                  | 34.7 | 1.33 | (0.80, 2.21) | 0.2677  |   |     |     |
| 39450006       | Senile cataract                                     | Another word for "senile cataract" is elderly cataract: lens clouding, caused by aging.                                                                                                                                    | 119       | 0.8 | 33                  | 27.7 | 0.96 | (0.56, 1.63) | 0.8997  |   |     |     |
| 16491000146102 | Injury of medial meniscus structure                 | A disease of cartilage and joint.                                                                                                                                                                                          | 104       | 0.7 | 44                  | 42.3 | 1.84 | (1.09, 3.08) | 0.016   | + |     |     |
| 72866009       | Varicose veins of lower extremity                   | A type of varicose veins.                                                                                                                                                                                                  | 91        | 0.6 | 35                  | 38.5 | 1.57 | (0.90, 2.70) | 0.1057  |   |     |     |
| 25071000146105 | Osteoarthritis of medial compartment of knee        | Osteoarthritis: this is a chronic joint disease in which alteration of the cartilage in the joints leads to pain and stiffness.                                                                                            | 84        | 0.6 | 28                  | 33.3 | 1.25 | (0.70, 2.22) | 0.4819  |   |     |     |
| 254837009      | Malignant neoplasm of breast                        | Another word for "malignant neoplasm of breast" is breast cancer: a malignant tumor in the breast.                                                                                                                         | 80        | 0.6 | 23                  | 28.7 | 1.01 | (0.55, 1.84) | 1       |   |     |     |
| 78275009       | Obstructive sleep apnea syndrome                    | Another word for "obstructive sleep apnea syndrome" is OSA or OSAS: temporary stop of breathing during sleep caused by the airway becoming blocked by the tongue, the soft part of the palate, or the wall of the pharynx. | 79        | 0.6 | 27                  | 34.2 | 1.3  | (0.72, 2.33) | 0.3894  |   |     |     |
| 239865003      |                                                     |                                                                                                                                                                                                                            | 78        | 0.6 | 26                  | 33.3 | 1.25 | (0.69, 2.26) | 0.4702  |   |     |     |

(Continued)

| Id             | Diagnosis                                 | Clarification                                                                                                                                                                                                                                                           | Logged in |     | Viewed problem list |      |      |              |         |   |     |
|----------------|-------------------------------------------|-------------------------------------------------------------------------------------------------------------------------------------------------------------------------------------------------------------------------------------------------------------------------|-----------|-----|---------------------|------|------|--------------|---------|---|-----|
|                |                                           |                                                                                                                                                                                                                                                                         | I         | %   | v                   | %    | OR   | (95% CI)     | p-Value | * | ref |
| 195967001      | Osteoarthritis of acromioclavicular joint | A disease of the shoulder. Osteoarthritis: this is a chronic joint disease in which alteration of the cartilage in the joints leads to pain and stiffness.                                                                                                              | 74        | 0.5 | 31                  | 41.9 | 1.8  | (1.00, 3.24) | 0.0426  | + |     |
| 39898005       | Asthma                                    | Attacks of breathlessness and shortness of breath, caused by narrowing of the smaller airways.                                                                                                                                                                          | 74        | 0.5 | 21                  | 28.4 | 0.99 | (0.52, 1.84) | 1       |   |     |
| 202842005      | Sleep disorder                            | Collective term for disorders in which sleep is disturbed or in which abnormal behavior occurs during sleep.                                                                                                                                                            | 72        | 0.5 | 18                  | 25.0 | 0.84 | (0.43, 1.59) | 0.6485  |   |     |
| 49526009       | Partial thickness rotator cuff tear       | A disease of the shoulder.                                                                                                                                                                                                                                              | 72        | 0.5 | 19                  | 26.4 | 0.9  | (0.46, 1.70) | 0.7639  |   |     |
| 254701007      | Presbycusis                               | A type of hearing loss.                                                                                                                                                                                                                                                 | 71        | 0.5 | 18                  | 25.4 | 0.85 | (0.43, 1.62) | 0.6491  |   |     |
| 26241000146104 | Basal cell carcinoma of skin              | Another word for "basal cell carcinoma of skin" is basal cell cancer: form of skin cancer, usually in areas of the skin exposed to the sun; rarely metastasizes.                                                                                                        | 71        | 0.5 | 22                  | 31.0 | 1.13 | (0.60, 2.09) | 0.7633  |   |     |
| 430725003      | Primary osteoarthritis of knee            | Osteoarthritis: his is a chronic joint disease in which alteration of the cartilage in the joints leads to pain and stiffness.                                                                                                                                          | 69        | 0.5 | 22                  | 31.9 | 1.17 | (0.62, 2.18) | 0.6487  |   |     |
| 60862001       | Patellofemoral stress syndrome            | Irritation that can occur between the kneecap and the knee joint because the kneecap slides over the joint when bending and stretching; gives pain at the kneecap, especially when squatting, climbing stairs, or cycling; mainly occurs in teenagers and young adults. | 69        | 0.5 | 23                  |      | 1.25 | (0.67, 2.32) | 0.452   |   |     |
|                | Tinnitus                                  | Another word for "tinnitus" is ringing in the ears: hearing sounds (such as humming, whistling, and wind noise) that do not come from outside.                                                                                                                          |           |     |                     |      |      |              |         |   |     |

Abbreviations: CI, confidence interval; OR, odds ratio.

**Supplementary Table S8** Patient account users with a certain diagnosis that viewed a diagnosis with an info button, clicked on it and answered the questionnaire, with the numbers. The columns with the asterisks \* show whether the CI is significantly differs from (whether it is lower or higher than) the CI of the total number of info button views, clicks or answers.

| Id             | Diagnosis                                    | Viewed info button |      | Clicked on info button |      |      |              |       |         |   |     |   |   |   |     |     |
|----------------|----------------------------------------------|--------------------|------|------------------------|------|------|--------------|-------|---------|---|-----|---|---|---|-----|-----|
|                |                                              | v                  | % v  | c                      | % c  | OR   | (95% CI)     |       | p-Value | * | ref |   |   |   |     |     |
|                |                                              |                    |      |                        |      |      | lower        | upper |         |   |     |   |   |   |     |     |
| 442520000      | Inflammation of rotator cuff tendon          | 71                 | 38.4 | 26                     | 36.6 | -    | -            | -     | -       | - | -   | - | - | - | ref |     |
| 239873007      | Osteoarthritis of knee                       | 61                 | 28.5 | 35                     | 57.4 | 2.31 | (1.09, 4.98) |       | .0228   |   |     |   |   |   |     | ref |
| 21522001       | Abdominal pain                               | 58                 | 43.6 | 19                     | 32.8 | 0.84 | (0.38, 1.86) |       | .7121   |   |     |   |   |   |     |     |
| 267103008      | Feeling of lump in throat                    | 58                 | 41.7 | 22                     | 37.9 | 1.06 | (0.48, 2.30) |       | 1       |   |     |   |   |   |     |     |
| 239872002      | Osteoarthritis of hip                        | 45                 | 33.8 | 26                     | 57.8 | 2.35 | (1.03, 5.46) |       | .0350   |   |     |   |   |   |     | +   |
| 16491000146102 | Injury of medial meniscus structure          | 44                 | 42.3 | 26                     | 59.1 | 2.48 | (1.08, 5.82) |       | .0218   |   |     |   |   |   |     | +   |
| 57406009       | Carpal tunnel syndrome                       | 42                 | 34.7 | 9                      | 21.4 | 0.48 | (0.17, 1.22) |       | .0984   |   |     |   |   |   |     |     |
| 72866009       | Varicose veins of lower extremity            | 35                 | 38.5 | 13                     | 37.1 | 1.02 | (0.40, 2.55) |       | 1       |   |     |   |   |   |     |     |
| 39450006       | Senile cataract                              | 33                 | 27.7 | 15                     | 45.5 | 1.44 | (0.57, 3.61) |       | .3988   |   |     |   |   |   |     |     |
| 195967001      | Asthma                                       | 31                 | 41.9 | 11                     | 35.5 | 0.95 | (0.35, 2.48) |       | 1       |   |     |   |   |   |     |     |
| 25071000146105 | Osteoarthritis of medial compartment of knee | 28                 | 33.3 | 13                     | 46.4 | 1.49 | (0.56, 3.98) |       | .3733   |   |     |   |   |   |     |     |
| 78275009       | Obstructive sleep apnea syndrome             | 27                 | 34.2 | 11                     | 40.7 | 1.19 | (0.43, 3.22) |       | .8163   |   |     |   |   |   |     |     |
| 239865003      | Osteoarthritis of acromioclavicular joint    | 26                 | 33.3 | 11                     | 42.3 | 1.27 | (0.45, 3.47) |       | .6424   |   |     |   |   |   |     |     |
| 399114005      | Adhesive capsulitis of shoulder              | 23                 | 42.6 | 11                     | 47.8 | 1.58 | (0.55, 4.55) |       | .4618   |   |     |   |   |   |     |     |
| 254837009      | Malignant neoplasm of breast                 | 23                 | 28.7 | 9                      | 39.1 | 1.11 | (0.37, 3.22) |       | 1       |   |     |   |   |   |     |     |
| 111360009      | Obstipation                                  | 23                 | 43.4 | 5                      | 21.7 | 0.48 | (0.13, 1.57) |       | .2133   |   |     |   |   |   |     |     |
| 60862001       | Tinnitus                                     | 23                 | 33.3 | 7                      | 30.4 | 0.76 | (0.23, 2.27) |       | .6264   |   |     |   |   |   |     |     |
| 247081001      | Posterior vitreous detachment                | 22                 | 34.4 | 8                      | 36.4 | 0.99 | (0.31, 2.94) |       | 1       |   |     |   |   |   |     |     |
| 430725003      | Patellofemoral stress syndrome               | 22                 | 31.9 | 11                     | 50.0 | 1.72 | (0.59, 5.08) |       | .3215   |   |     |   |   |   |     |     |
| 26241000146104 | Primary osteoarthritis of knee               | 22                 | 31.0 | 10                     | 45.5 | 1.44 | (0.48, 4.22) |       | .4649   |   |     |   |   |   |     |     |
